# Supplementary material for: Controllable growth of two-dimensional perovskite microstructures
Source: Royal Society of Chemistry journal article supplement (doi:10.1039/c8ce01087k), 2018-01-01
Supplement: c8ce01087k1.pdf [file c8ce01087k1.pdf]

## Supplementary Information

### Controllable Growth of Two-Dimensional Perovskite Microstructures

Chen Fang<sup>1</sup>, Junze Li<sup>1</sup>, Jun Wang<sup>1</sup>, Rong Chen<sup>1</sup>, Haizhen Wang<sup>2</sup>, Shangui Lan<sup>1</sup>, Yining Xuan<sup>1</sup>,  
Hongmei Luo<sup>2</sup>, Peng Fei<sup>1</sup> and Dehui Li<sup>1,3\*</sup>

<sup>1</sup>*School of Optical and Electronic Information, Huazhong University of Science and Technology,  
Wuhan, 430074, China;*

<sup>2</sup>*Department of Chemical and Materials Engineering, New Mexico State University, NM 88003,  
United States;*

<sup>3</sup>*Wuhan National Laboratory for Optoelectronics, Huazhong University of Science and  
Technology, Wuhan, 430074, China;*

\*Correspondence to: Email: [dehuili@hust.edu.cn](mailto:dehuili@hust.edu.cn).

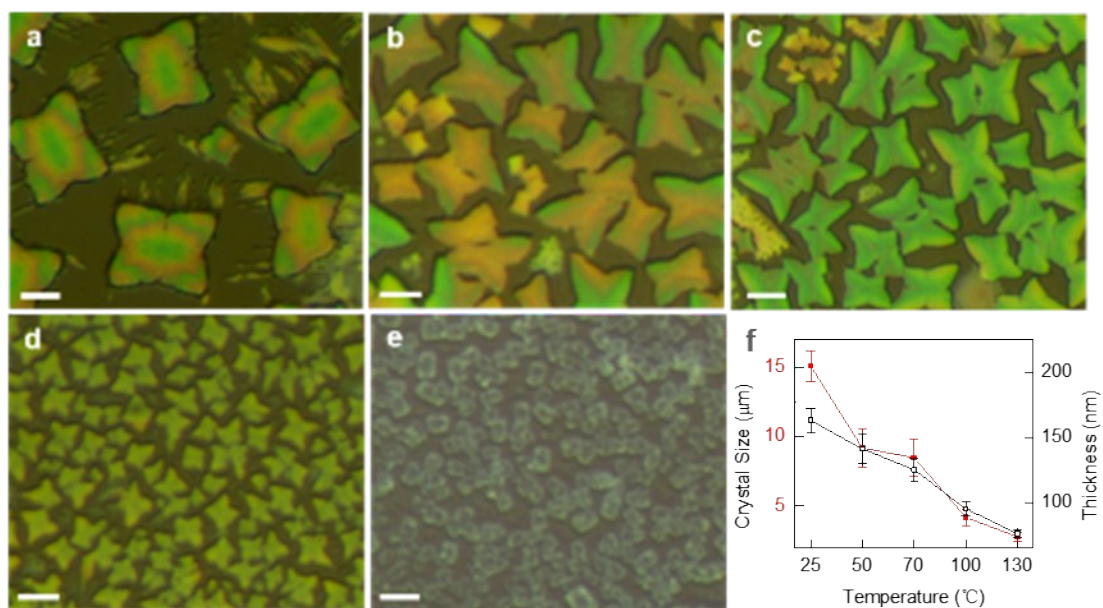

Fig. S1 OM images of  $(\text{BA})_2\text{PbI}_4$  butterflies grown on glass substrate at crystallization temperatures of (a) 25 $^{\circ}\text{C}$ , (b) 50 $^{\circ}\text{C}$ , (c) 70 $^{\circ}\text{C}$ , (d) 100 $^{\circ}\text{C}$  and (e) 130 $^{\circ}\text{C}$  with the mass ratio of 8.25%. The scale bar is 5  $\mu\text{m}$ . (f) Plots of crystal size and thickness of  $(\text{BA})_2\text{PbI}_4$  butterflies against the crystallization temperature.

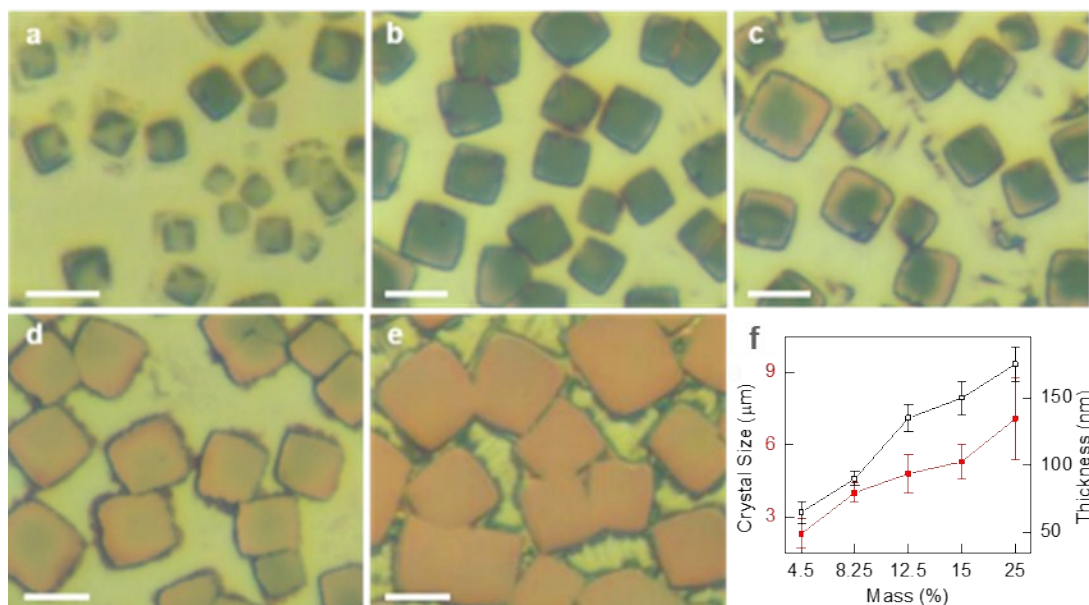

Fig. S2 OM images of  $(\text{BA})_2\text{PbI}_4/(\text{BA})_2(\text{MA})\text{Pb}_2\text{I}_7$  square plates grown on Si substrate at mass ratios of (a) 4.5%, (b) 8.25%, (c) 12.5%, (d) 15% and (e) 25% with the crystallization temperature of 70°C. The scale bar is 5  $\mu\text{m}$ . (f) Plots of crystal size and thickness of  $(\text{C}_4\text{H}_9\text{NH}_3)_2\text{PbI}_4/(\text{C}_4\text{H}_9\text{NH}_3)_2(\text{CH}_3\text{NH}_3)\text{Pb}_2\text{I}_7$  square plates against the perovskite mass ratio in DMF.
